# Supplementary material for: CO2 switchable adhesion of ionic polydimethylsiloxane elastomers
Source: Royal Society of Chemistry journal article supplement (doi:10.1039/d3cc04575g), 2023-01-01
Supplement: d3cc04575g1.pdf [file d3cc04575g1.pdf]

## CO<sub>2</sub> switchable adhesion of ionic polydimethylsiloxane elastomers

*Yohei Miwa,<sup>a,b,\*</sup> Masatoshi Tsunoda,<sup>a</sup> Shoei Shimosaki,<sup>a</sup> Rina Sawada,<sup>a</sup> and Shoichi  
Kutsumizu,<sup>a</sup>*

<sup>a</sup>Department of Chemistry and Biomolecular Science, Faculty of Engineering, Gifu  
University, Yanagido, Gifu 501-1193, Japan.

<sup>b</sup>PRESTO, Japan Science and Technology Agency.

\*Author to whom correspondence should be addressed.

**E-mail: [miwa.yohei.y6@f.gifu-u.ac.jp](mailto:miwa.yohei.y6@f.gifu-u.ac.jp)**

## **Table of Contents**

### **<Supplementary Methods>**

### **<Supplementary Figures>**

**Fig. S1.**  $^1\text{H-NMR}$  spectra of (a) PDMS-NH<sub>2</sub> and (b) PDMS-COOH.

**Fig. S2.** FT-IR spectra of the indicated samples.

**Fig. S3.** Effect of CO<sub>2</sub> gas on viscoelastic property of (a) PDMS-Li and (b) PDMS-Na. Temperature and frequency are 25 °C and 1 Hz, respectively.

**Fig. S4.** Selected force vs time curves of (a) PDMS-Li and (b) PDMS-Na at 25 °C in different gases.

**Fig. S5.** Effect of velocity of the probe at removing on the adhesion of PDMS-Cs.

### **<Supplementary Video>**

**Movie S1.** CO<sub>2</sub>-responsive adhesion behavior of PDMS-Cs sheet.

## 1. Supplementary Methods

### 1.1 Sample Preparation.

**Materials.** Diethoxydimethylsilane (DEDMS, >98%), 3-aminopropyldiethoxymethylsilane (APDEMS, >97%), butyl isocyanate (> 98.0 %), and octamethylcyclotetrasiloxane (D4, >98.0%) were purchased from Tokyo Chemical Industry Co., Ltd. 1,3-bis(3-aminopropyldiethoxymethylsilane (97%) was purchased from Shin-Etsu Chemical Co., Ltd. Molecular sieves (3A 1/16), succinic anhydride (SA, ≥98.0%), lithium hydroxide monohydrate (LiOH, ≥95%), sodium hydroxide (NaOH, 97%), cesium hydroxide monohydrate (CsOH, ≥95%), deuterated chloroform (CDCl<sub>3</sub>, 99.8%), and deuterated dimethyl sulfoxide (DMSO-d<sub>6</sub>, 99.8%) were purchased from Nacalai Tesque, Inc. Tetramethylammonium hydroxide pentahydrate (>99%), aluminum oxide, acetone (extra-pure (EP) reagent grade), tetrahydrofuran (THF, EP), chloroform (EP), methanol (EP), and ethanol (EP) were purchased from Kanto Chemical Co., Inc.

**Preparation of PDMS-NH<sub>2</sub>.** DEDMS (416 g, 2.81 mol), APDEMS (59.7 g, 3.12 × 10<sup>-1</sup> mol), water (561 g, 31.2 mol), and ethanol (800 g) were stirred at room

temperature for 110 h. The reaction mixture was further stirred at 80 °C for 48 h to remove the solvents. And then, the reaction mixture was further heated at 85 °C and 140 °C for 9 h and 14 h, respectively, in a vacuum. The resultant polymer is called 10NH<sub>2</sub>. A mixture of D4 (500mL, 1.62 mol), 10NH<sub>2</sub> (189 g), and AMM (1.7 mL,  $6.17 \times 10^{-3}$  mol) was stirred under N<sub>2</sub> gas flow for 1 h in a 1000 mL three-necked flask. Then, TMAHP ( $1.09 \times 10^{-1}$  g,  $5.65 \times 10^{-4}$  mol) was quickly added to the mixture. The mixture was heated and stirred at 100 °C for 46 h under N<sub>2</sub> gas flow. During the reaction, the viscosity of the mixture increased. To terminate the reaction, the mixture was heated at 150 °C and stirred for 2 h. After that, the reaction mixture was slowly cooled to room temperature. The resultant polymer, PDMS-NH<sub>2</sub>, was transferred to a Teflon container and vacuum-dried at 110 °C for 6 h. The amine concentration of PDMS-NH<sub>2</sub> was determined to be 3.2 mol% via neutralization titration with HCl and bromophenol blue as an indicator. <sup>1</sup>H-nuclear magnetic resonance (NMR) spectrum of PDMS-NH<sub>2</sub> is shown in Fig. S1a.

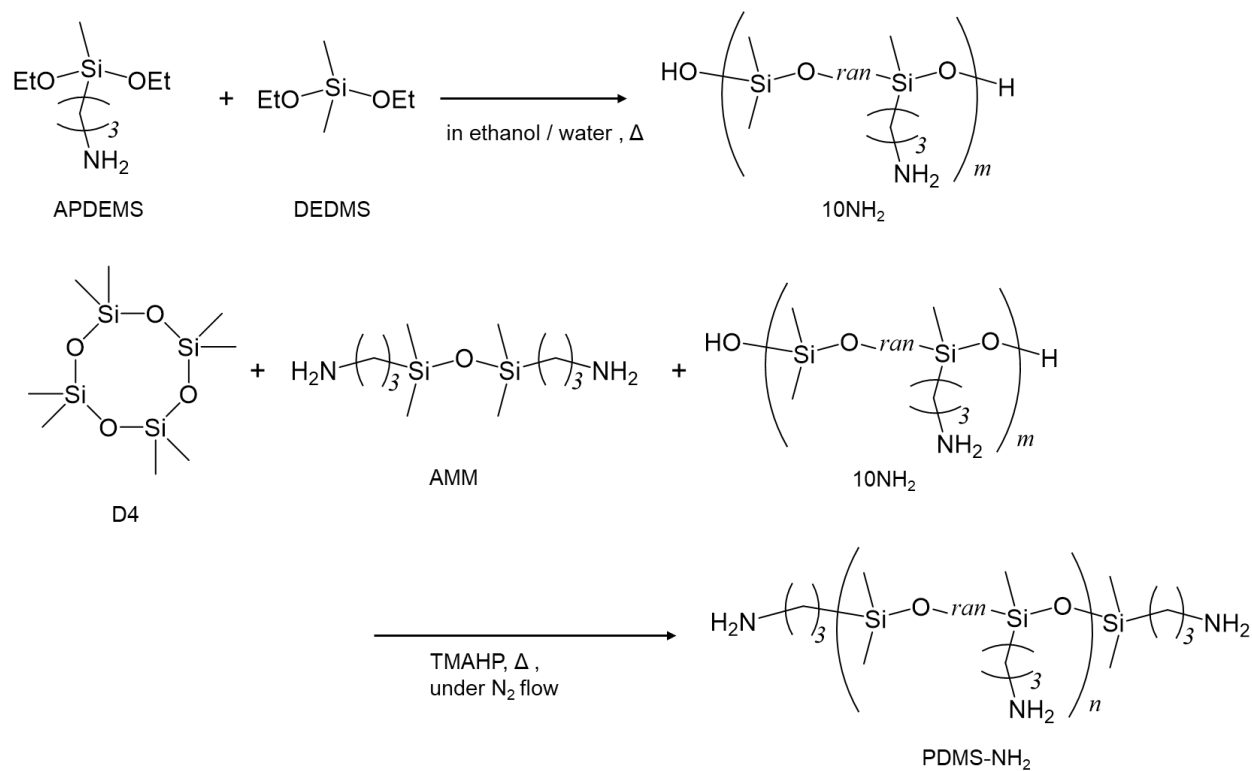

**Scheme S1**

**Preparation of PDMS-COOH.** 81.4 g of PDMS-NH<sub>2</sub> (81.4 g) and SA (10.6 g, 1.06 × 10<sup>-1</sup> mol) were separately dissolved in 300 ml and 200 mL of dehydrated chloroform, respectively. The SA/chloroform solution was stirred at 50 °C until clear solution was obtained. These solutions were mixed and stirred overnight at room temperature. The precipitated SA was removed by filtration, and the solution was subjected to an evaporator to remove the solvent. Here, since some unreacted

SA precipitated as a powder, the polymer was dissolved in hexane containing small amount of chloroform and SA was removed by filtration. After that, the solvent was removed from the polymer using an evaporator. This procedure was repeated three times. Then, the polymer was further purified via precipitation from acetone solution to methanol. This precipitation was repeated twice. Finally, the precipitated polymer was carefully washed with methanol in a Teflon container. The polymer was dried at room temperature for 24 h, and further dried at 35 °C for 48 h in vacuum. The resultant polymer is named as PDMS-COOH. The concentration of carboxy group in PDMS-COOH was determined to be 3.5 mol% via the neutralization titration with NaOH/methanol solution and phenolphthalein. <sup>1</sup>H-NMR spectrum of PDMS-COOH is shown in Fig. S1b.

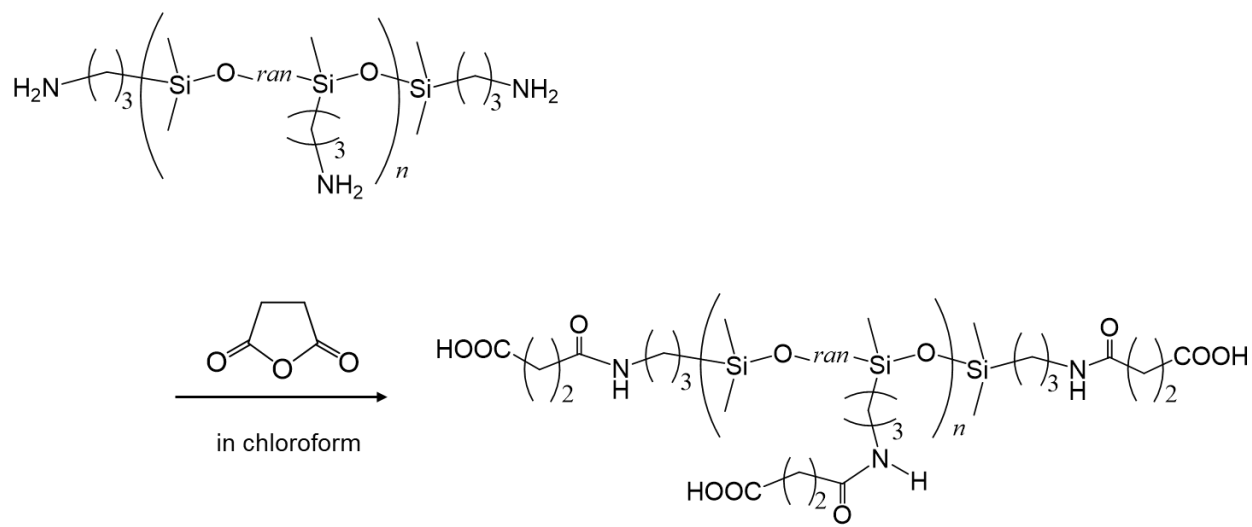

**Scheme S2**

**Preparation of PDMS-*M*.** Methanol solution of LiOH, NaOH, or CsOH was added dropwise to stirred THF solution of PDMS-COOH. The carboxy groups of PDMS-COOH were fully neutralized. The neutralized solution was gently poured into a Teflon petri dish, covered with aluminum foil with small holes. The solution was dried at 35 °C for 24 h in air to make a sheet. The sheet was further dried at 35 °C for more than 48 h in vacuum. The thickness of the sheet was ca. 0.5 mm. Fourier transform infrared (FT-IR) spectra of PDMS-*M* are shown in Fig. S2.

## 1-2. Measurements.

A Perkin Elmer Spectrum 400 (MIR/FIR) was used for FT-IR spectroscopy measurement. Measurements were performed on the transmittance mode with the optical resolution of  $4.00\text{ cm}^{-1}$ .

NMR measurements were performed on a JEOL FT-NMR spectrometer  $\alpha$ -400. PDMS-NH<sub>2</sub> was dissolved in CDCl<sub>3</sub>. For PDMS-COOH, a mixture of CDCl<sub>3</sub> and DMSO-d<sub>6</sub> at a volume ratio of 9:1 was used as a solvent.

Small-angle X-ray scattering (SAXS) measurements were carried out at the beamline BL-15A2 at the Photon Factory (PF) of the High Energy Accelerator Research Organization (KEK) in Tsukuba, Japan. The sample sheets were vacuum-dried for more than two nights and stored in an aluminum package with molecular sieves. Before the measurement, the package was opened, and the sample sheets were quickly set at the sample chamber at the beamline. Dry N<sub>2</sub> or CO<sub>2</sub> gas was flown into the sample chamber. The wavelength of X-ray was 1.2 Å. X-ray scattering from the specimen was recorded using PILATUS-2M detector. Silver behenate and stearic acid were used as standards.



Anton Paar MCR302 was used for rheology measurements. The measurement temperature was controlled using a Peltier temperature controller. Dry N<sub>2</sub> or CO<sub>2</sub> gas was flow into a Peltier hood to control the gaseous atmosphere during the measurements. A stainless-steel parallel plate with a diameter of 4 mm was used as a jig. Before measurement, a sample sheet was vacuum-dried at room temperature for more than 48 h. The measurements were performed at 25° C and a strain of 0.2 % with a frequency of 1 Hz. During the measurement, the inflow gas was switched in the order of N<sub>2</sub> → CO<sub>2</sub> → N<sub>2</sub>.

The probe tack tests were conducted at 25°C under controlled gas atmosphere (N<sub>2</sub> or CO<sub>2</sub>) using Anton Paar MCR302. A stainless-steel parallel plate with a diameter of 4 mm was used as a probe. The measurements were performed for a sample sheet attached on a copper plate. The sample sheet on a copper plate was vacuum-dried at room temperature for more than 48 h and fixed with screws to an iron cover placed on the Peltier plate at the MCR302. Furthermore, the sample sheet was covered with a Peltier hood and dried by flowing dry N<sub>2</sub> gas overnight. The probe approached at a speed of 10 μm s<sup>-1</sup> and contacted with a load of 0.5 N to the

sample sheet for 30 s. And then, the probe was removed from the sample sheet with a speed of  $10 \mu\text{m s}^{-1}$ . The measurements were repeated with an interval of 5 min. During the repeated measurements, the inflow gas was changed in the order of  $\text{N}_2 \rightarrow \text{CO}_2 \rightarrow \text{N}_2$ .

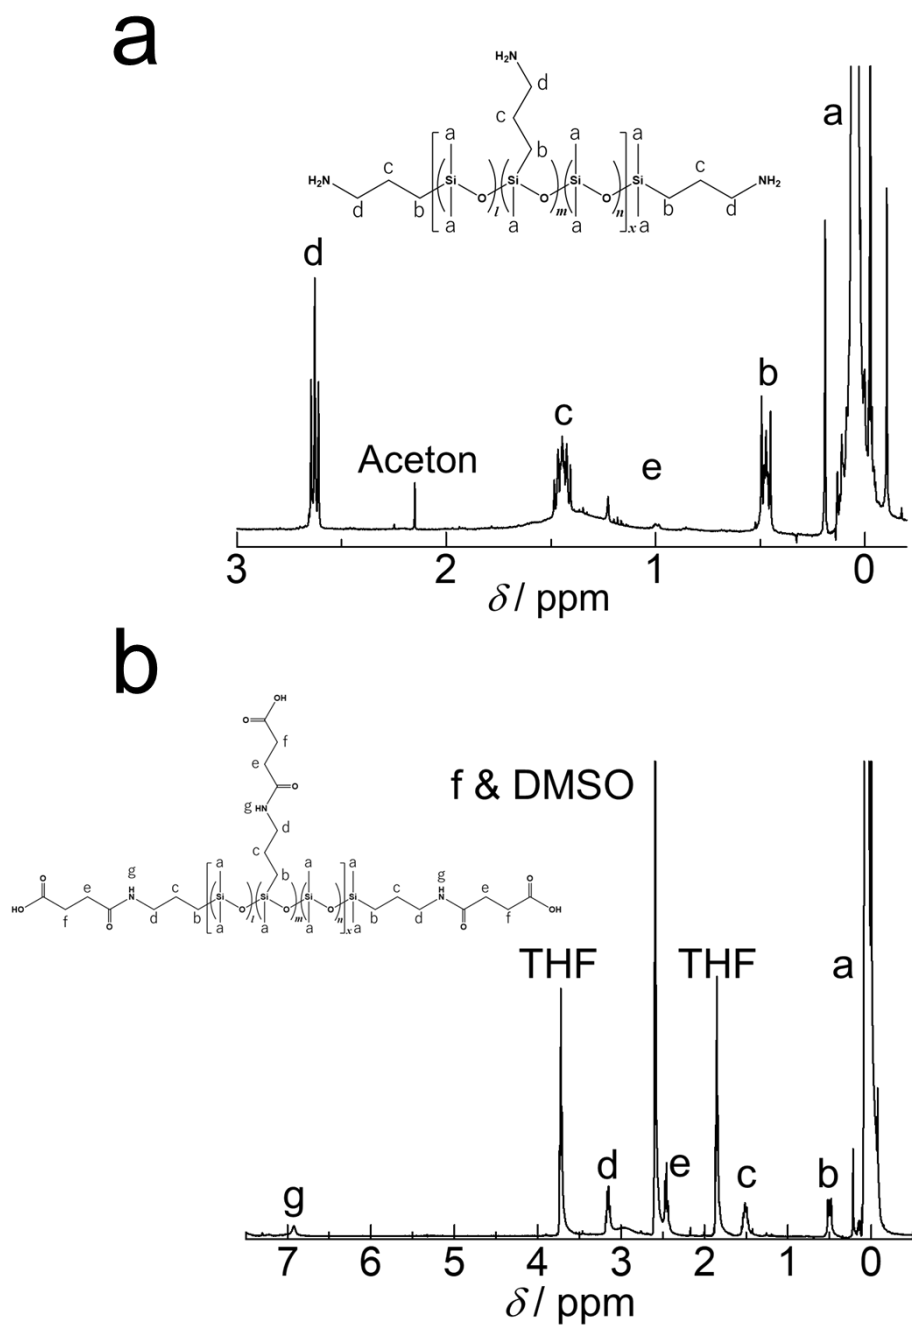

**Fig. S1.**  $^1\text{H-NMR}$  spectra of (a) PDMS-NH<sub>2</sub> and (b) PDMS-COOH.

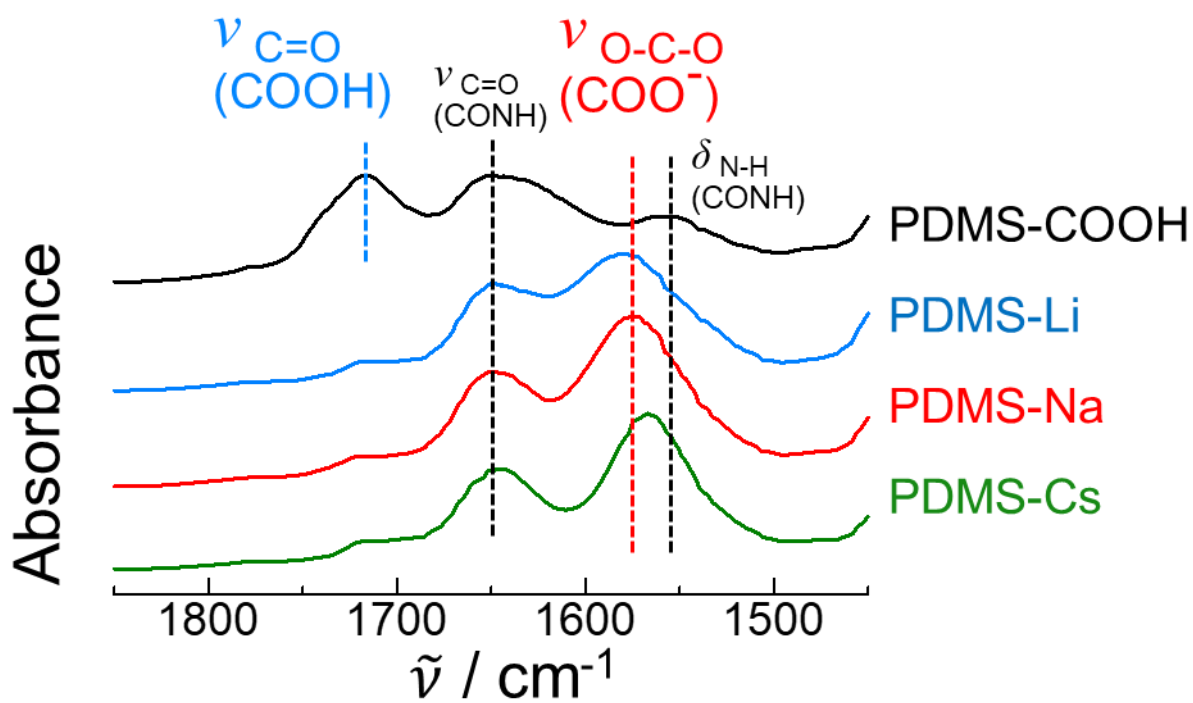

**Fig. S2.** FT-IR spectra of the indicated samples.

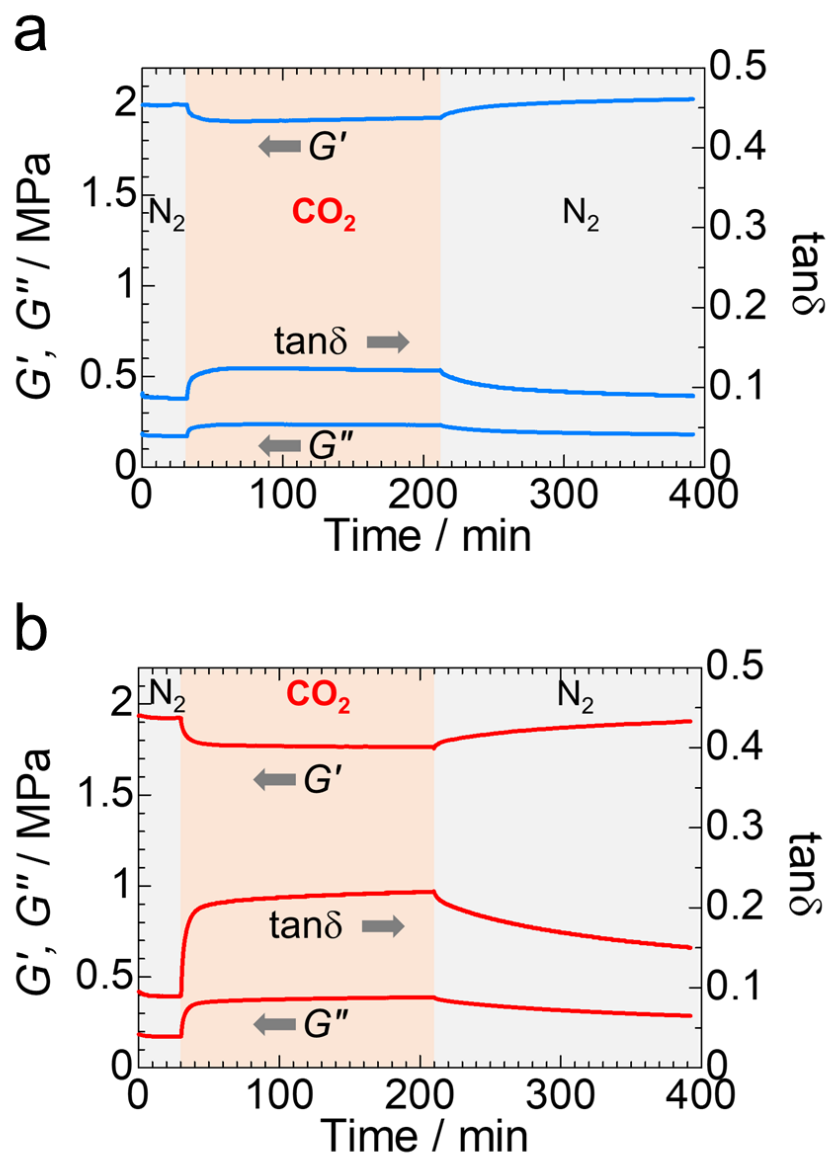

**Fig. S3.** Effect of  $CO_2$  gas on viscoelastic property of (a) PDMS-Li and (b) PDMS-Na. Temperature and frequency are  $25\text{ }^\circ\text{C}$  and  $1\text{ Hz}$ , respectively.

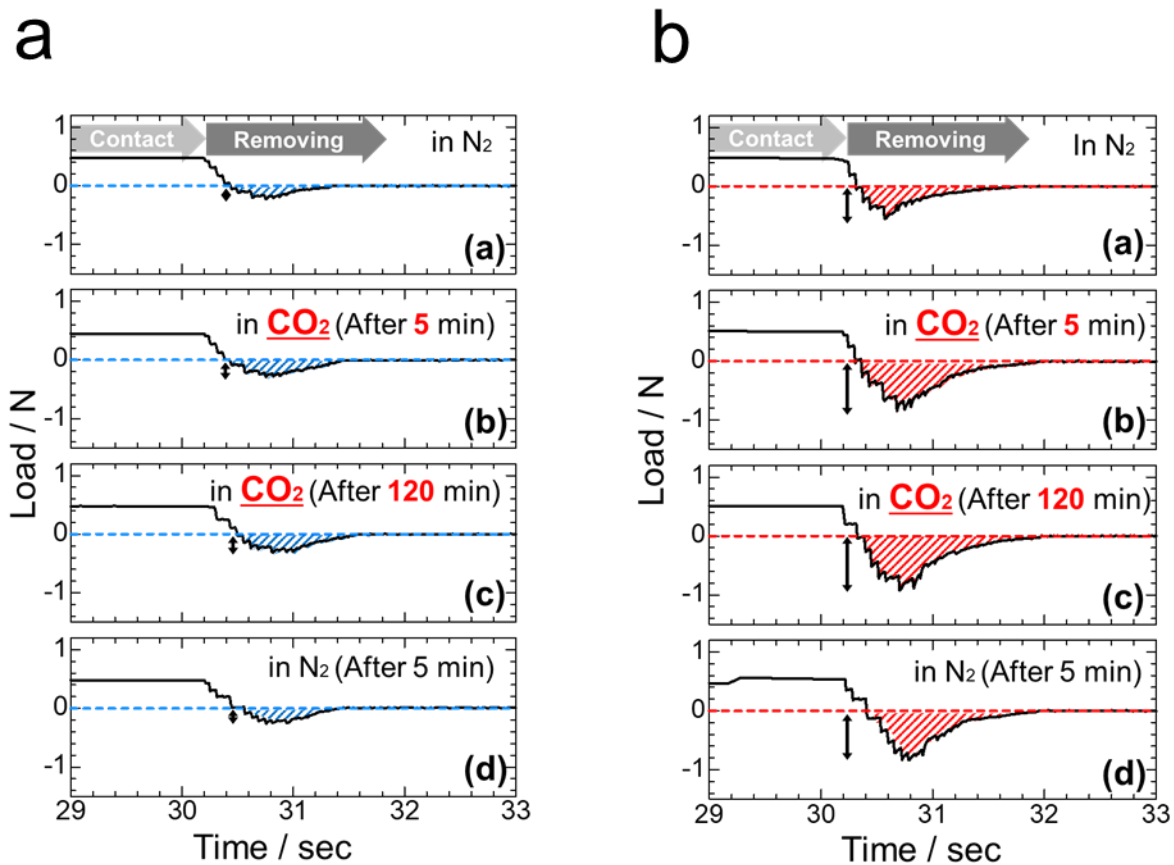

**Fig. S4.** Selected force vs time curves of (a) PDMS-Li and (b) PDMS-Na at 25 °C in different gases.

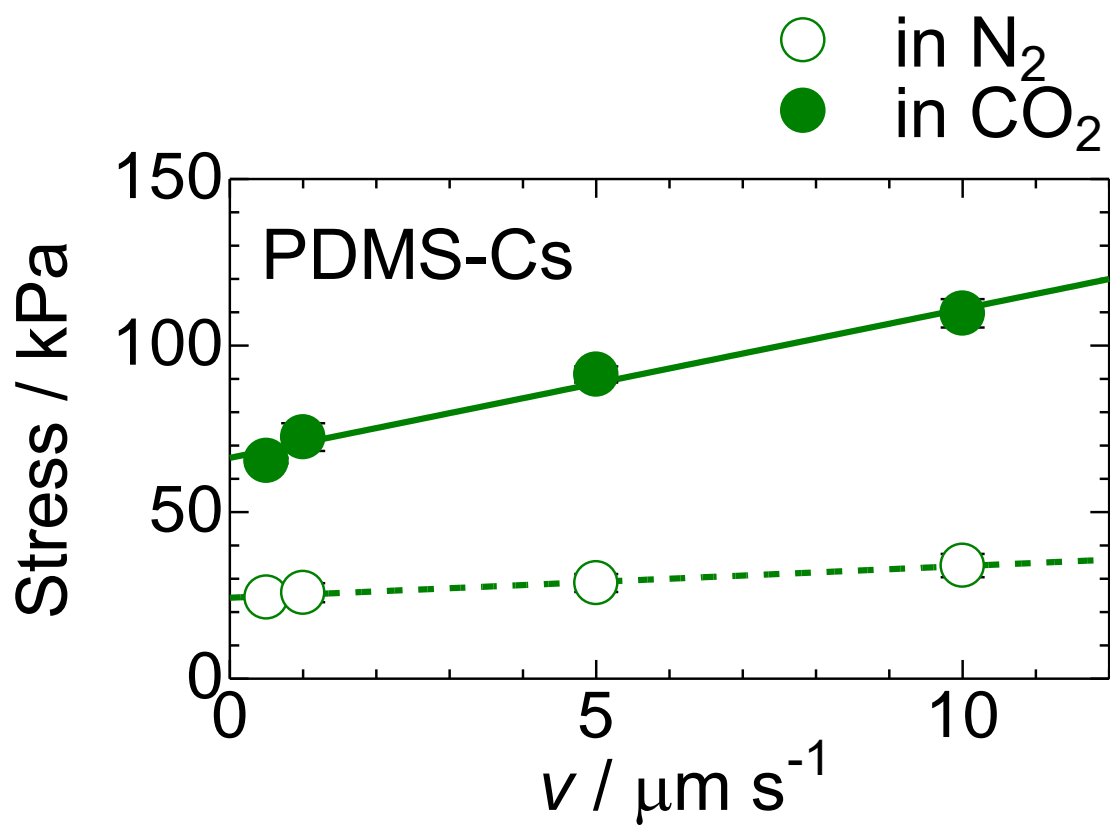

**Fig. S5.** Effect of velocity of the probe at removing on the adhesion of PDMS-Cs.
